# Supplementary material
Source: PubMed Central journal article supplement (PMC8662136)
Supplement: ZAAC-647-2201-s001.pdf [file ZAAC-647-2201-s001.pdf]

# Zeitschrift für anorganische und allgemeine Chemie

Supporting Information

**Metal complexes of Tridentate Schiff base: Synthesis,  
Characterization, Biological Activity and Molecular Docking  
Studies with COVID-19 Protein Receptor**

Gehad G. Mohamed, M. M. Omar, and Yasmin M. Ahmed\*

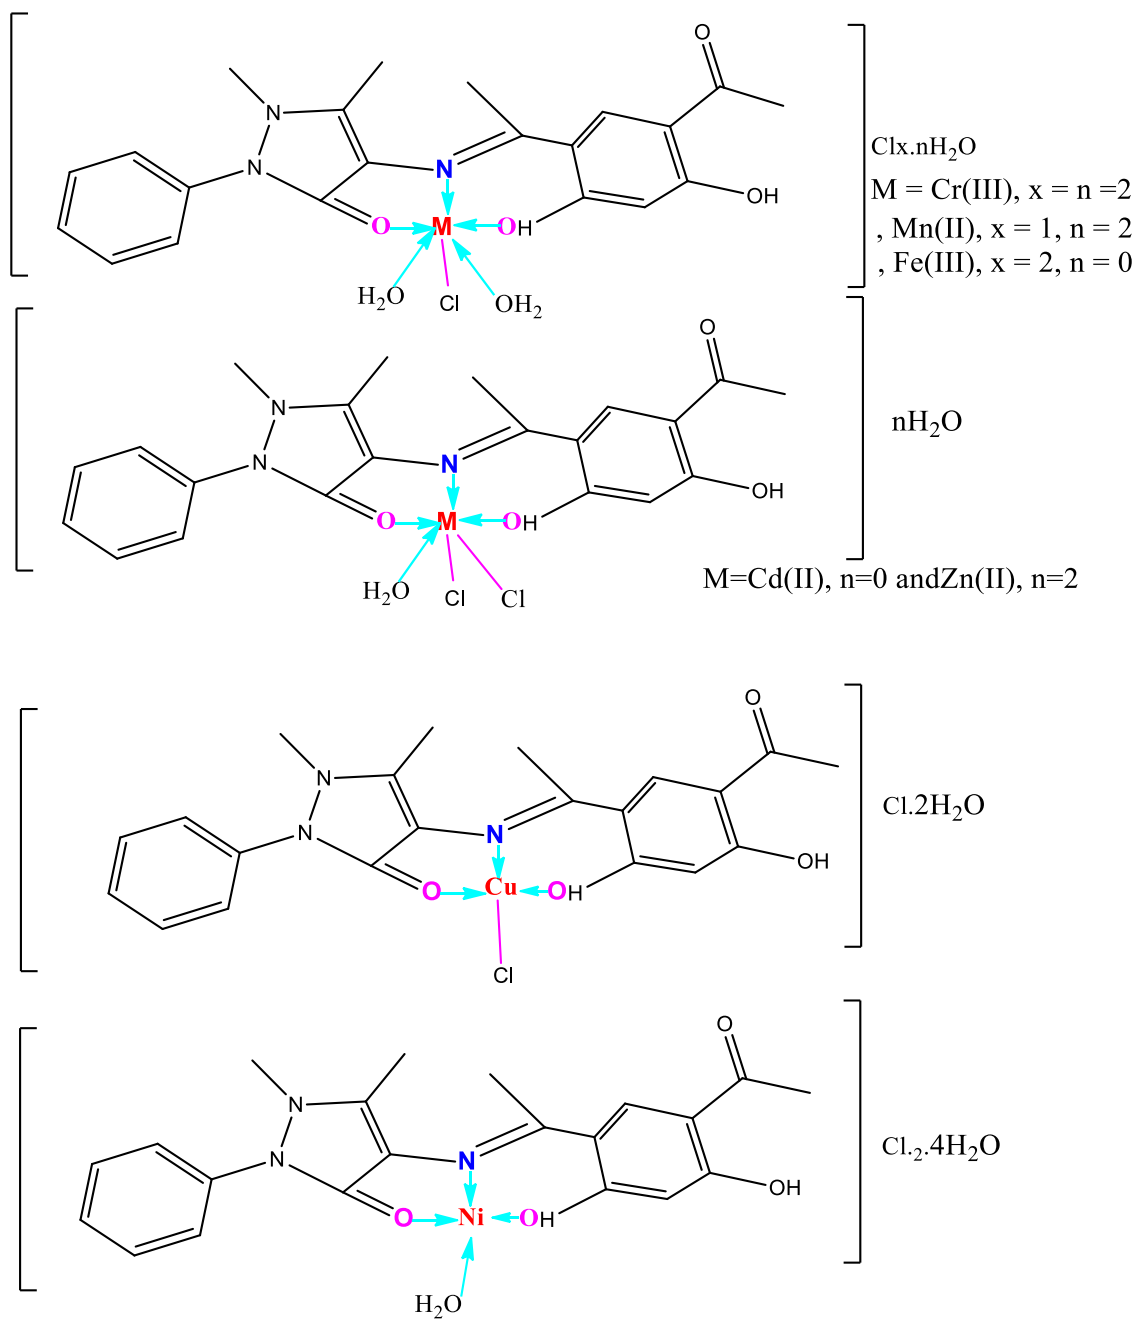

Figure S1. Structures of Schiff base metal complexes.

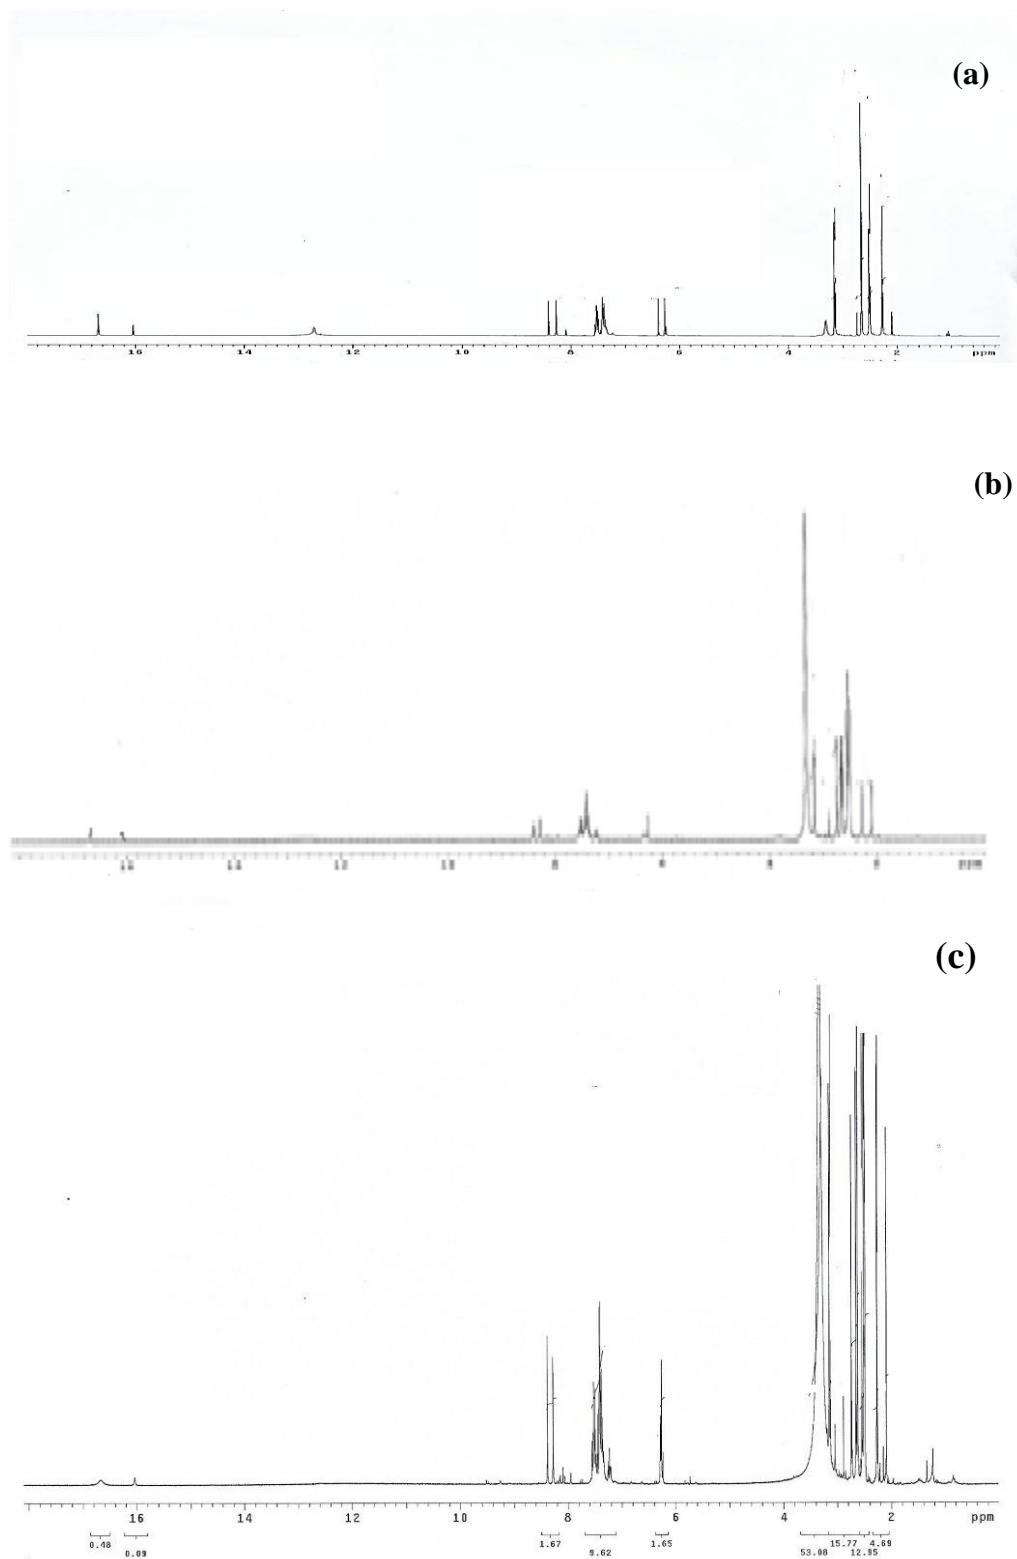

**Figure S2.**  $^1\text{H}$  NMR spectra of (a)  $\text{H}_2\text{L}$ , (b)  $\text{Zn(II)}$  and (c)  $\text{Cd(II)}$  complexes.

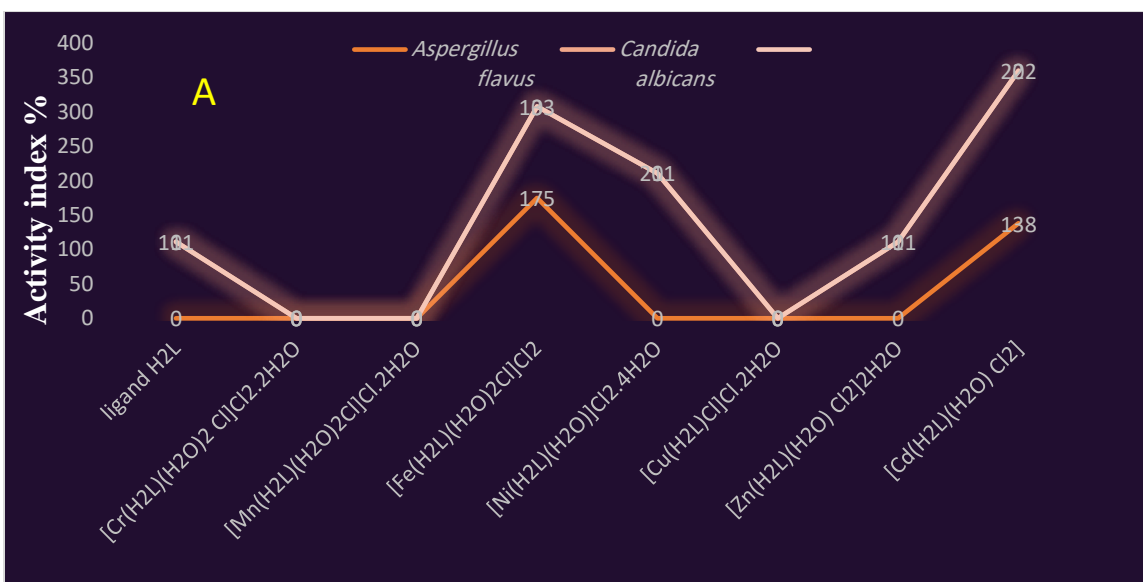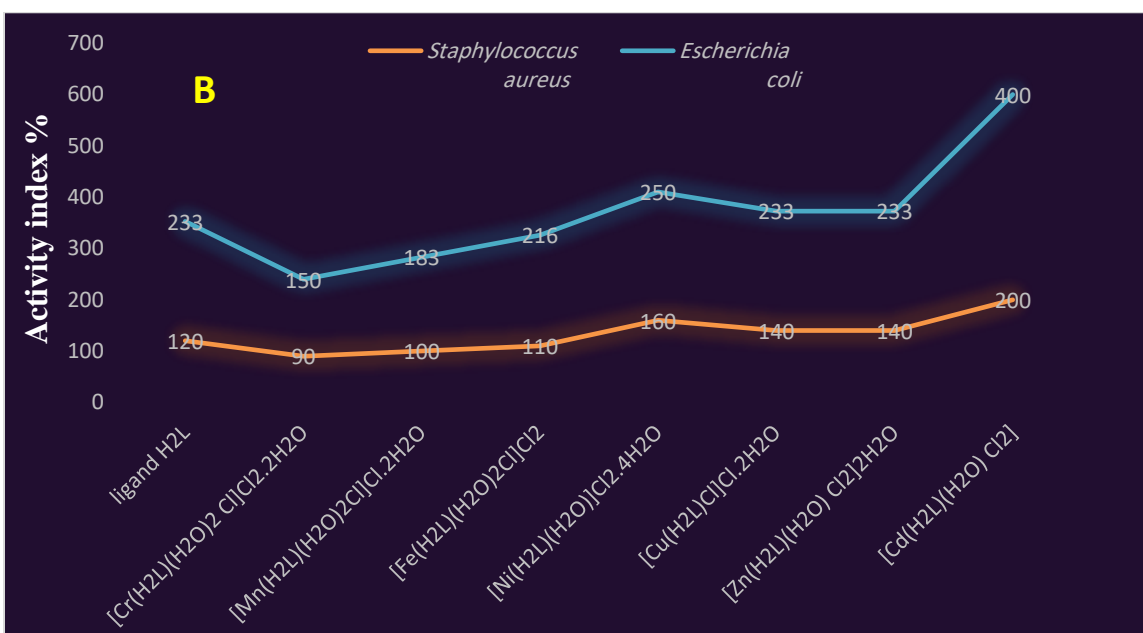

Figure S8. Activity index of Schiff base ligand (H<sub>2</sub>L) and its metal complexes against (A) different fungal (B) different Gram (+ve) and Gram (-ve) bacteria.

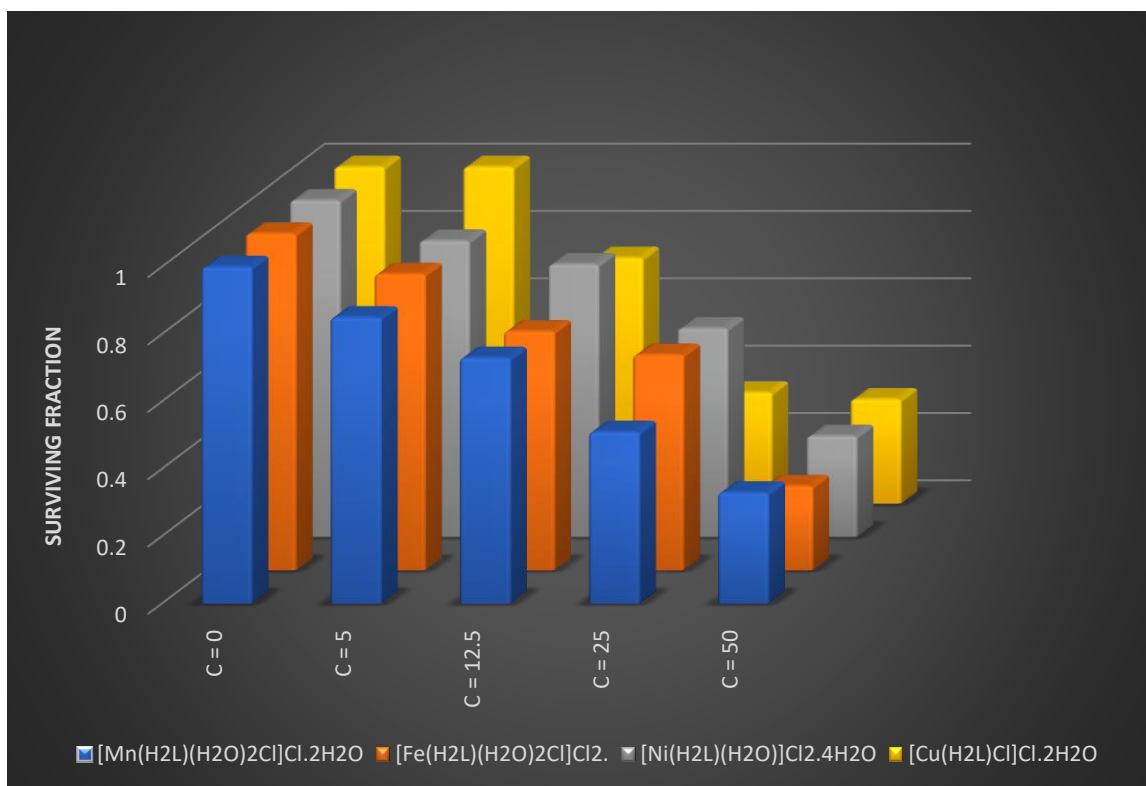

Figure S9 . Anticancer effects of Schiff base ligand and its metal complexes in terms of % cell inhibition at 100 µg/ml concentration.

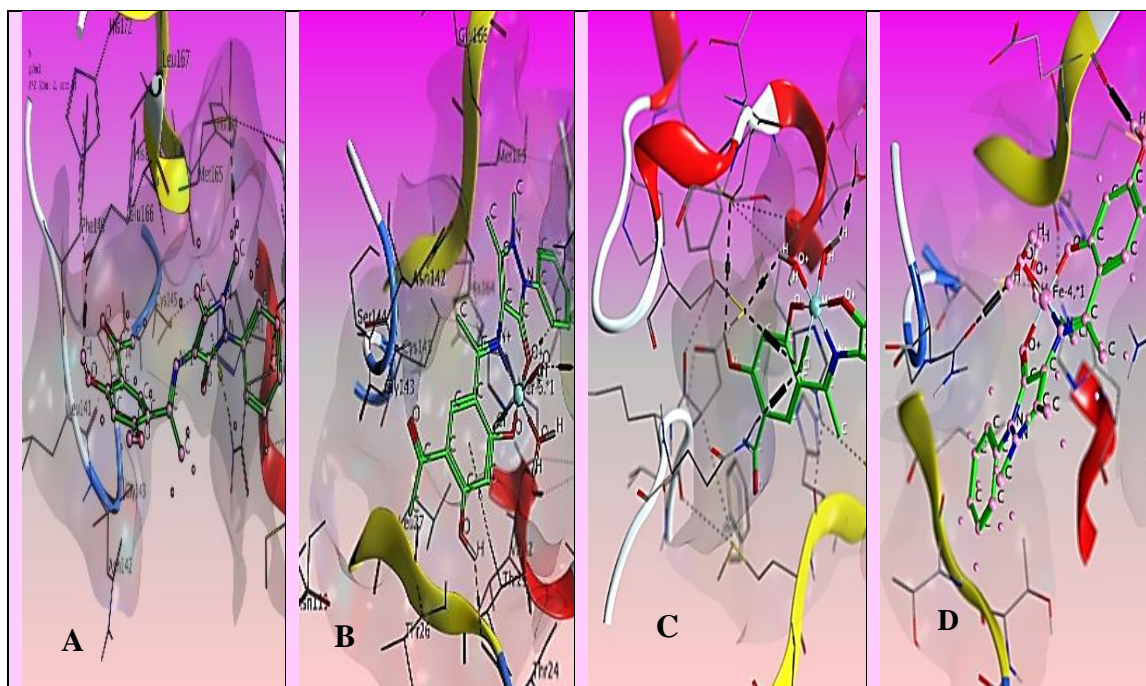

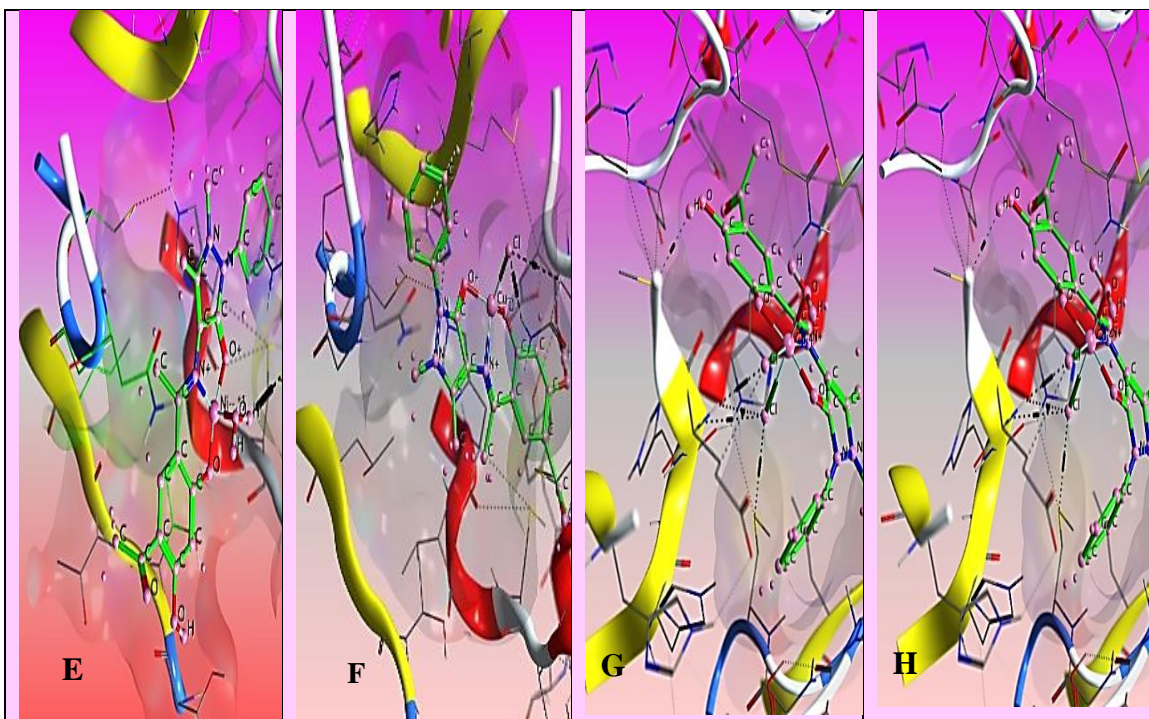

Figure S11. 3D Molecular docking simulation studies of the interaction between (A) Schiff base ligand H<sub>2</sub>L and (B) Cr(III), (C) Mn(II), (D) Fe(III), (E) Ni(II), (F) Cu(II), (G) Zn(II) and (H) Cd(II) complexes with the active site of the receptor of PDB ID: 6XBH. The docked conformation of the compound is shown in ball and stick representation.

Table S3. The different optimized and quantum chemical parameters of H<sub>2</sub>L and its Cd(II) complex.

| Bond lengths (Å) | H <sub>2</sub> L | [Cd(H <sub>2</sub> L)(H <sub>2</sub> O)Cl <sub>2</sub> ] |
|------------------|------------------|----------------------------------------------------------|
| C(1) - N(2)      | 1.46             | 1.47                                                     |
| C(1) - O(24)     | 1.25             | 1.33                                                     |
| N(2) - N(3)      | 1.41             | 1.43                                                     |
| N(2) - C(4)      | 1.47             | 1.47                                                     |
| N(3) - C(15)     | 1.47             | 1.47                                                     |
| N(3) - C(19)     | 1.50             | 1.49                                                     |
| C(25) - N(26)    | 1.46             | 1.50                                                     |
| N(26) - C(27)    | 1.31             | 1.31                                                     |
| C(29) - O(40)    | 1.43             | 1.45                                                     |
| C(34) - O(42)    | 1.43             | 1.43                                                     |
| O(40) - H(41)    | 0.96             | 0.96                                                     |
| O(42) - H(43)    | 0.96             | 0.96                                                     |
| C(44) - O(45)    | 1.26             | 1.26                                                     |
| Cd(50) - Cl(51)  | -----            | 2.40                                                     |
| Cd(50) - Cl(52)  | ----             | 2.40                                                     |

|                                                   |          |          |
|---------------------------------------------------|----------|----------|
| Cd(50) - O(53)                                    | ----     | 3.11     |
| O(40) - Cd(50)                                    | ----     | 3.06     |
| N(26) - Cd(50)                                    | ----     | 3.06     |
| O(24) - Cd(50)                                    | ----     | 3.08     |
| <b>Bond angles (°)</b>                            |          |          |
| O(24)- Cd(50)- O(40)                              | ----     | 114      |
| O(24) -Cd(50) - Cl(52)                            | ----     | 89       |
| N(26) - Cd(50) - Cl(52)                           | ----     | 93       |
| O(40) - Cd(50) - Cl(51)                           | ----     | 90       |
| O(40) - Cd(50) - O(53)                            | ----     | 94       |
| Cl(51) - Cd(50) - O(53)                           | ----     | 86       |
| <b>The calculated quantum chemical parameters</b> |          |          |
| E (a.u.)                                          | -1270.99 | -7705.93 |
| Dipole moment<br>(Debye)                          | 4.60     | 13.75    |
| E <sub>HOMO</sub> (eV)                            | -5.51    | -6.10    |
| E <sub>LUMO</sub> (eV)                            | -1.70    | -2.30    |
| $\Delta E$ (eV)                                   | 3.81     | 3.80     |
| $\chi$ (eV)                                       | -3.61    | -4.20    |
| $\eta$ (eV)                                       | 1.91     | 1.90     |
| $\sigma$ (eV) <sup>-1</sup>                       | 0.52     | 0.53     |
| Pi (eV)                                           | 3.61     | 4.20     |
| S (eV) <sup>-1</sup>                              | 0.26     | 0.26     |
| $\omega$ (eV)                                     | 3.41     | 4.64     |
| $\Delta N_{\max}$                                 | 1.89     | -2.21    |

Table S7. Biological activity of Schiff base ligand (H<sub>2</sub>L) and its metal complexes.

| Sample                                                                                     |                                  | Inhibition zone diameter (mm/mg sample) |                         |                           |                         |
|--------------------------------------------------------------------------------------------|----------------------------------|-----------------------------------------|-------------------------|---------------------------|-------------------------|
|                                                                                            |                                  | Bacterial species                       |                         | Fungal species            |                         |
|                                                                                            |                                  | G <sup>+</sup>                          | G <sup>-</sup>          |                           |                         |
|                                                                                            |                                  | <i>Staphylococcus aureus</i>            | <i>Escherichia coli</i> | <i>Aspergillus flavus</i> | <i>Candida albicans</i> |
| Control: DMSO                                                                              |                                  | 0.0                                     | 0.0                     | 0.0                       | 0.0                     |
| Standard                                                                                   | Amikacin<br>Antibacterial agent  | 10                                      | 6                       | --                        | --                      |
|                                                                                            | ketokonazole<br>Antifungal agent | --                                      | --                      | 8                         | 9                       |
| H <sub>2</sub> L                                                                           |                                  | 12                                      | 14                      | 0                         | 10                      |
| [Cr(H <sub>2</sub> L)(H <sub>2</sub> O) <sub>2</sub> Cl]Cl <sub>2</sub> ·2H <sub>2</sub> O |                                  | 9                                       | 9                       | 0                         | 0                       |
| [Mn(H <sub>2</sub> L)(H <sub>2</sub> O) <sub>2</sub> Cl]Cl·2H <sub>2</sub> O               |                                  | 10                                      | 11                      | 0                         | 0                       |
| [Fe(H <sub>2</sub> L)(H <sub>2</sub> O) <sub>2</sub> Cl]Cl <sub>2</sub>                    |                                  | 11                                      | 13                      | 14                        | 12                      |
| [Ni(H <sub>2</sub> L)(H <sub>2</sub> O)]Cl <sub>2</sub> ·4H <sub>2</sub> O                 |                                  | 16                                      | 15                      | 0                         | 19                      |
| [Cu(H <sub>2</sub> L)Cl]Cl·2H <sub>2</sub> O                                               |                                  | 14                                      | 14                      | 0                         | 0                       |
| [Zn(H <sub>2</sub> L)(H <sub>2</sub> O)Cl <sub>2</sub> ]·2H <sub>2</sub> O                 |                                  | 14                                      | 14                      | 0                         | 10                      |
| [Cd(H <sub>2</sub> L)(H <sub>2</sub> O)Cl <sub>2</sub> ]                                   |                                  | 20                                      | 24                      | 11                        | 20                      |
